# Supplementary material for: Centric-to-acentric structure transformation induced by a stereochemically active lone pair: a new insight for design of IR nonlinear optical materials
Source: Royal Society of Chemistry journal article supplement (doi:10.1039/c9tc00647h), 2019-01-01
Supplement: c9tc00647h1.pdf [file c9tc00647h1.pdf]

## *Electronic Supplementary Information (ESI)*

---

# **Centric-to-Acentric Structure Transformation Induced by Stereochemically Active Lone Pair: A New Insight for Design of IR Nonlinear Optical Materials**

*Hua Lin,<sup>a</sup> Yan-Yan Li,<sup>b</sup> Meng-Yue Li,<sup>a</sup> Zuju Ma,<sup>\*,c</sup> Li-Ming Wu<sup>\*,d</sup> Xin-Tao Wu<sup>a</sup> and Qi-Long Zhu<sup>\*,a</sup>*

*<sup>a</sup>State Key Laboratory of Structural Chemistry, Fujian Institute of Research on the Structure of Matter, Chinese Academy of Sciences, Fuzhou, Fujian 350002, China*

*<sup>b</sup>Taishan Scholar Advantage and Characteristic Discipline Team of Eco Chemical Process and Technology, Key Laboratory of Eco-chemical Engineering, College of Chemistry and Molecular Engineering, Qingdao University of Science and Technology, Qingdao 266042, China*

*<sup>c</sup>School of Materials Science and Engineering, Anhui University of Technology, Maanshan, 243002, China*

*<sup>d</sup>Key Laboratory of Theoretical and Computational Photochemistry, Ministry of Education, College of Chemistry, Beijing Normal University, Beijing 100875, China*

To whom correspondence should be addressed. E-mail: zjma@outlook.com; wlm@bnu.edu.cn; qlzhu@fjirsm.ac.cn.

## **1. Experimental Section**

### **1.1 Materials and Instruments**

All reagents were obtained from commercial sources and used without further purification. La ingot (2N) was purchased from Hohhot Jinrui Rare Earth Co., Ltd., Cu shot (5N), Sb lump (5N), and S powder (5N) were purchased from Alfa-Aesar.

## ***Electronic Supplementary Information (ESI)***

---

Note that the external oxide layer on the surface of La ingot required to be thoroughly scraped before using it as reagent. Powder X-ray diffraction (PXRD) analysis was carried out in a Rigaku Mini-Flex II powder diffractometer (Cu- $K_{\alpha}$ ,  $\lambda = 1.5418 \text{ \AA}$ ). The semi-quantitative energy dispersive X-ray (EDX, Oxford INCA) spectra were measured with a field emission scanning electron microscope (FESEM, JSM6700F). Solid-state UV–Vis–NIR diffuse reflectance spectrum was recorded on a Perkin-Elmer Lambda 950 UV–Vis spectrophotometer with  $\text{BaSO}_4$  as the standard.

### **1.2 Synthesis**

The compound  $\text{La}_2\text{CuSbS}_5$  was prepared from the elements (elemental ratio La : Cu : Sb : S = 2 : 1 : 1 : 5) in a  $\text{BaCl}_2/\text{CsBr}$  (1 : 1) flux at 1273 K. The starting reactants were loaded in a glove-box into carbon-coated silica tubes that were subsequently evacuated to  $10^{-3}$  Pa and sealed. The tubes were heated at 1273 K for 72 h, and then cooled at  $3 \text{ K h}^{-1}$  to 673 K, and later the computer-controlled furnace was shut off. The dark-red flake crystals of  $\text{La}_2\text{CuSbS}_5$  (see Figure S1a) are easily isolated from the products by washing with distilled water and dried by ethanol. The composition La : Cu : Sb : S of approximately 2 : 1 : 1 : 5 was established by EDX with the use of a JSM-6700F SEM (see Figure S1b). The homogeneous  $\text{La}_2\text{CuSbS}_5$  was obtained as analyzed by the PXRD patterns shown in Figure S1c. Title compounds are stable in air more than three months.

### **1.3 Single crystal X-ray Crystallography**

The single-crystal diffraction data collections was taken on a Mercury CCD equipped with graphite-monochromated Mo- $K_{\alpha}$  radiation ( $\lambda = 0.71073 \text{ \AA}$ ) at room-temperature.

## *Electronic Supplementary Information (ESI)*

---

The absorption correction was done<sup>1</sup> and the structure was solved by the direct methods and refined by the full-matrix least-square fitting on  $F^2$  using the *SHELX-2014* software.<sup>2</sup> All of the non-hydrogen atoms were refined with anisotropic thermal parameters and the coordinates were standardized using *STRUCTURE TIDY*.<sup>3</sup> The refinement details are summarized in Table S1. The positional coordinates and isotropic equivalent thermal parameters are given in Table S2, and the selected bond distances are listed in Table S3.

### **2. Computational details**

The DFT calculations have been performed using the *Vienna ab initio simulation package* (VASP)<sup>4-6</sup> with the Perdew-Burke-Ernzerhof (PBE)<sup>7</sup> exchange correlation functional. The projected augmented wave (PAW)<sup>8</sup> potentials with the valence states 3s and 3p for S, 4s and 3d for Cu, 5s and 5p for Sb, 6s and 5d for La, respectively, have been used. A  $\Gamma$ -centered  $3 \times 5 \times 5$  Monkhorst-Pack grid for the Brillouin zone sampling<sup>9</sup> and a cutoff energy of 500 eV for the plane wave expansion were found to get convergent lattice parameters. Both the cell and atomic relaxations were carried out until the residual forces are below 0.02 eV/Å. A Monkhorst-Pack k-point mesh<sup>6</sup> of  $5 \times 9 \times 9$  was used for the calculation of the linear and nonlinear optical properties. To better describe the exchange–correlation effects of localized electrons, a hybrid functionals (HSE06)<sup>10</sup> was used for the electronic structure calculations. The spin-polarization was considered in all calculations.

The imaginary part of the dielectric function due to direct inter-band transitions is given by the expression:

## *Electronic Supplementary Information (ESI)*

---

$$\varepsilon_2(\hbar\omega) = \frac{2e^2\pi}{\Omega\varepsilon_0} \sum_{k,v,c} \left| \langle \psi_k^c | u \cdot r | \psi_k^v \rangle \right|^2 \delta(E_k^c - E_k^v - E) \quad \dots\dots\dots (1)$$

Where  $\Omega$ ,  $\omega$ ,  $u$ ,  $v$  and  $c$  are the unit-cell volume, photon frequencies, the vector defining the polarization of the incident electric field, valence and conduction bands, respectively. The real part of the dielectric function is obtained from  $\varepsilon_2$  by a Kramers-Kronig transformation:

$$\varepsilon_1(\omega) = 1 + \left(\frac{2}{\pi}\right) \int_0^{+\infty} d\omega' \frac{\omega'^2 \varepsilon_2(\omega')}{\omega'^2 - \omega^2} \quad \dots\dots\dots (2)$$

The refractive index  $n(\omega)$  can be obtained based on  $\varepsilon_1$  and  $\varepsilon_2$ .

In calculation of the static  $\chi^{(2)}$  coefficients, the so-called length-gauge formalism derived by Aversa and Sipe<sup>11</sup> and modified by Rashkeev et al<sup>12</sup> is adopted, which has been proved to be successful in calculating the second order susceptibility for semiconductors and insulators.<sup>13-16</sup> In the static case, the imaginary part of the static second-order optical susceptibility can be expressed as:

$$\begin{aligned} \chi^{abc} &= \frac{e^3}{\hbar^2\Omega} \sum_{nml,k} \frac{r_{nm}^a (r_{ml}^b r_{ln}^c + r_{ml}^c r_{ln}^b)}{2\omega_{nm}\omega_{ml}\omega_{ln}} [\omega_n f_{ml} + \omega_m f_{ln} + \omega_l f_{nm}] \\ &+ \frac{ie^3}{4\hbar^2\Omega} \sum_{nm,k} \frac{f_{nm}}{\omega_{mn}^2} [r_{nm}^a (r_{mn;c}^b + r_{mn;b}^c) + r_{nm}^b (r_{mn;c}^a + r_{mn;a}^c) + r_{nm}^c (r_{mn;b}^a + r_{mn;a}^b)] \\ &\dots\dots\dots(3) \end{aligned}$$

where  $r$  is the position operator,  $\hbar\omega_{nm} = \hbar\omega_n - \hbar\omega_m$  is the energy difference for the bands  $m$  and  $n$ ,  $f_{mn} = f_m - f_n$  is the difference of the Fermi distribution functions, subscripts  $a$ ,  $b$ , and  $c$  are Cartesian indices, and  $r_{mn;a}^b$  is the so-called generalized derivative of the coordinate operator in  $k$  space,

## *Electronic Supplementary Information (ESI)*

---

$$r_{nm;a}^b = \frac{r_{nm}^a \Delta_{mn}^b + r_{nm}^b \Delta_{mn}^a}{\omega_{nm}} + \frac{i}{\omega_{nm}} \times \sum_l (\omega_{lm} r_{nl}^a r_{lm}^b - \omega_{nl} r_{nl}^b r_{lm}^a) \dots\dots\dots (4)$$

where  $\Delta_{nm}^a = (p_{nm}^a - p_{mm}^a) / m$  is the difference between the electronic velocities at the bands  $n$  and  $m$ .

As the nonlinear optical coefficients is sensitive to the momentum matrix, much finer k-point grid and large amount of empty bands are required to obtain a convergent  $\chi^{(2)}$  coefficient. The  $\chi^{(2)}$  coefficients here were calculated from PBE wavefunctions with a  $5 \times 9 \times 9$  k-point grid and about 260 empty bands. A scissor operator has been added to correct the conduction band energy (corrected to the experimental gap), which has been proved to be reliable in predicting the second order susceptibility for semiconductors and insulators.<sup>17-19</sup>

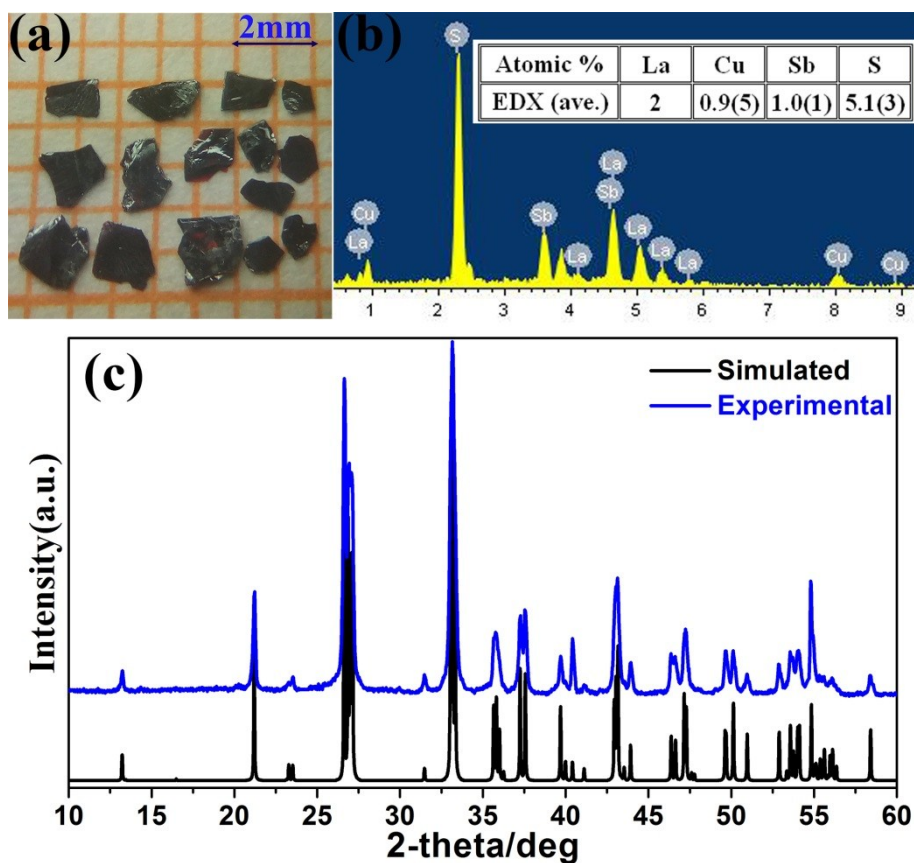

**Figure S1.** The characterizations of  $\text{La}_2\text{CuSbS}_5$ : (a) the photograph of crystals, (b) EDX results; and (c) PXR patterns.

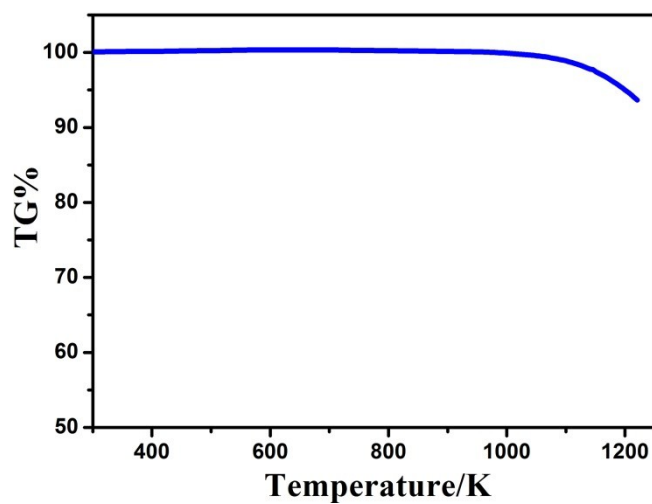

**Figure S2.** The TG curve of  $\text{La}_2\text{CuSbS}_5$ .

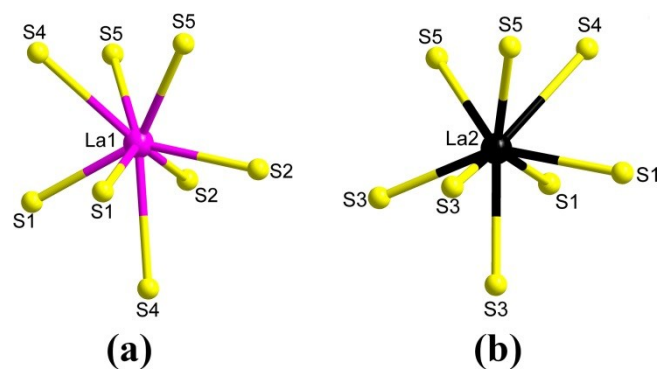

**Figure S3.** The local coordination environment of (a) La1 and (b) La2 atoms in  $\text{La}_2\text{CuInS}_5$ .

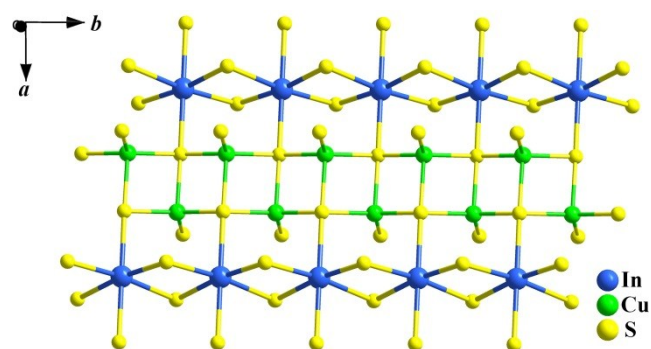

**Figure S4.** The 1D  $\{[\text{CuSbS}_5]^{6-}\}_n$  chain in  $\text{La}_2\text{CuInS}_5$ .

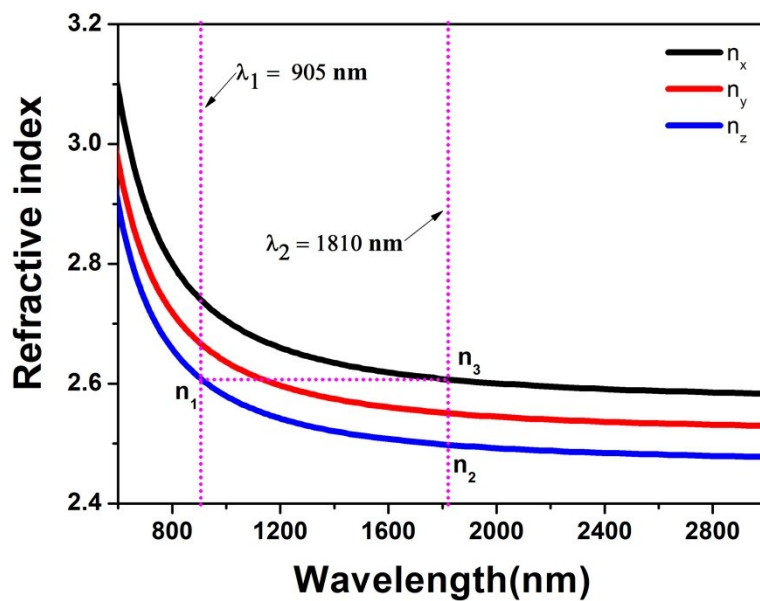

**Figure S5.** Phase-matching capabilities for La<sub>2</sub>CuSbS<sub>5</sub> at 1810 nm. The minimum refractive index at 905 nm ( $n_1$ ) located between the minimum ( $n_2$ ) and maximum refractive index ( $n_3$ ) at 1810 nm indicates the fulfillment of the requirement of the phase-matching condition.



## *Electronic Supplementary Information (ESI)*

---

**Table S1.** Crystallographic data and refinement details for La<sub>2</sub>CuSbS<sub>5</sub>.

| Empirical formula                                                                        | La <sub>2</sub> CuSbS <sub>5</sub> |
|------------------------------------------------------------------------------------------|------------------------------------|
| Formula weight                                                                           | 623.41                             |
| Temperature(K)                                                                           | 293(2)                             |
| Crystal system                                                                           | Orthorhombic                       |
| Space group                                                                              | <i>Ima2</i> (No.46)                |
| <i>a</i> (Å)                                                                             | 13.382(6)                          |
| <i>b</i> (Å)                                                                             | 7.558(3)                           |
| <i>c</i> (Å)                                                                             | 7.635(3)                           |
| <i>V</i> (Å <sup>3</sup> )                                                               | 772.1(5)                           |
| <i>Z</i>                                                                                 | 4                                  |
| <i>D<sub>c</sub></i> (g·cm <sup>-3</sup> )                                               | 5.36                               |
| $\mu$ (mm <sup>-1</sup> )                                                                | 18.27                              |
| GOOF on <i>F</i> <sup>2</sup>                                                            | 1.092                              |
| <i>R</i> <sub>1</sub> , <i>wR</i> <sub>2</sub> ( <i>I</i> > 2σ( <i>I</i> )) <sup>a</sup> | 0.0439, 0.1145                     |
| <i>R</i> <sub>1</sub> , <i>wR</i> <sub>2</sub> (all data)                                | 0.0444, 0.1147                     |
| Largest diff. peak and hole (e·Å <sup>-3</sup> )                                         | 3.527, -2.741                      |

<sup>a</sup>:  $R_1 = \frac{\sum ||F_o| - |F_c||}{\sum |F_o|}$ ,  $wR_2 = [\frac{\sum w(F_o^2 - F_c^2)^2}{\sum w(F_o^2)^2}]^{1/2}$

---

## *Electronic Supplementary Information (ESI)*

---

**Table S2.** Atomic coordinates and equivalent isotropic displacement parameters of  $\text{La}_2\text{CuSbS}_5$ .

| Atom | Wyckff | $x$       | $y$       | $z$       | $U_{\text{eq}}(\text{\AA})^a$ |
|------|--------|-----------|-----------|-----------|-------------------------------|
| La1  | $4a$   | 0         | 0         | 0.0011(2) | 0.0115(4)                     |
| La2  | $4b$   | 0.25      | 0.1341(2) | 0.3864(3) | 0.0117(4)                     |
| Cu   | $4a$   | 0         | 0         | 0.5400(8) | 0.054(2)                      |
| Sb   | $4b$   | 0.25      | 0.6716(3) | 0.2188(3) | 0.016(5)                      |
| S1   | $4b$   | 0.25      | 0.508(2)  | 0.502(2)  | 0.019(2)                      |
| S2   | $8c$   | 0.1054(4) | 0.3197(7) | 0.1744(6) | 0.011(2)                      |
| S3   | $8c$   | 0.6037(4) | 0.1644(7) | 0.3295(7) | 0.010(2)                      |

$U_{\text{eq}}$  is defined as one third of the trace of the orthogonalized  $U_{ij}$  tensor.

---

**Table S3.** Selected bond lengths ( $\text{\AA}$ ) of  $\text{La}_2\text{CuSbS}_5$ .

|                   |          |                   |          |
|-------------------|----------|-------------------|----------|
| La1–S2 $\times 2$ | 3.095(5) | La2–S2 $\times 2$ | 2.886(5) |
| La1–S3 $\times 2$ | 3.123(5) | La2–S2 $\times 2$ | 2.950(5) |
| La1–S2 $\times 2$ | 3.172(5) | La2–S1            | 2.961(8) |
| La1–S3 $\times 2$ | 3.174(5) | La2–S3 $\times 2$ | 3.019(6) |
| La1–S1 $\times 2$ | 3.346(2) | La2–S1            | 3.130(2) |
| Cu–S2 $\times 2$  | 2.214(6) | Sb–S3 $\times 2$  | 2.467(6) |
| Cu–S3 $\times 2$  | 2.460(7) | Sb–S1             | 2.486(2) |
|                   |          | Sb–S1             | 2.934(9) |

---

**Table S4.** SHG intensities comparison of the well-known IR-NLO sulfides in recent

## *Electronic Supplementary Information (ESI)*

---

years at the same measured wavelength ( $\lambda = 2050$  nm).

| Compounds                                                       | SHG              | LIDT             | Ref.             |
|-----------------------------------------------------------------|------------------|------------------|------------------|
| SnGa <sub>4</sub> S <sub>7</sub>                                | 1.3 × AGS        | 19 × AGS         | 20               |
| Li <sub>2</sub> ZnSiS <sub>4</sub>                              | 1.1 × AGS        | 10 × AGS         | 21               |
| Na <sub>2</sub> ZnGe <sub>2</sub> S <sub>6</sub>                | 0.9 × AGS        | 6 × AGS          | 22               |
| Li <sub>2</sub> BaSnS <sub>4</sub>                              | 0.7 × AGS        | 6.5 × AGS        | 23               |
| Li <sub>2</sub> BaGeS <sub>4</sub>                              | 0.5 × AGS        | 11 × AGS         | 23               |
| Ba <sub>6</sub> Zn <sub>7</sub> Ga <sub>2</sub> S <sub>16</sub> | 0.5 × AGS        | 28 × AGS         | 24               |
| BaAl <sub>4</sub> S <sub>7</sub>                                | 0.5 × AGS        | 10 × AGS         | 25               |
| Li <sub>2</sub> MnGeS <sub>4</sub>                              | 0.5 × AGS        | 40 × AGS         | 26               |
| Na <sub>2</sub> BaSnS <sub>4</sub>                              | 0.5 × AGS        | 5 × AGS          | 27               |
| Na <sub>2</sub> BaGeS <sub>4</sub>                              | 0.3 × AGS        | 8 × AGS          | 27               |
| <b>La<sub>2</sub>CuSbS<sub>5</sub></b>                          | <b>0.5 × AGS</b> | <b>6.7 × AGS</b> | <b>This work</b> |
| AgGaS <sub>2</sub> (AGS)                                        | 1.0 × AGS        | 1.0 × AGS        | 28               |

### REFERENCES

- [1] *Crystal Clear*, version 1.3.5; Rigaku Corp.: The Woodlands, TX, **1999**.
- [2] G. M. Sheldrick, *Acta Crystallogr., Sect. A: Found. Crystallogr.* **2008**, 112–122.
- [3] L. M. Gelato and E. Parthe, *J. Appl. Crystallogr.* **1987**, **20**, 139–143.
- [4] G. Kresse, VASP, 5.3.5; <http://cms.mpi.univie.ac.at/vasp/vasp/vasp.html>, **2014**.
- [5] G. Kresse, J. Furthmuller, *Phys. Rev. B: Condens. Matter* **1996**, **54**, 11169–11186.
- [6] G. Kresse, D. Joubert, *Phys. Rev. B: Condens. Matter* **1999**, **59**, 1758–1775.
- [7] J. P. Perdew, K. Burke, M. Ernzerhof, *Phys. Rev. Lett.* **1996**, **77**, 3865–3868.
- [8] P. E. Blochl, *Phys. Rev. B: Condens. Matter* **1994**, **50**, 17953–17979.
- [9] H. J. Monkhorst, J. D. Pack, *Phys. Rev. B: Condens. Matter* **1976**, **13**, 5188.

## *Electronic Supplementary Information (ESI)*

---

- [10] J. Heyd, G. E. Scuseria, M. Ernzerhof, *J. Chem. Phys.* **2003**, *118*, 8207–8215.
- [11] C. Aversa, J. E. Sipe, *Phys. Rev. B* **1995**, *52*, 14636–14645.
- [12] S. N. Rashkeev, W. R. L. Lambrecht, B. Segall, *Phys. Rev. B* **1998**, *57*, 3905.
- [13] J. Hu, Z. Ma, J. Li, C. He, Q. Li, K. Wu, *J. Phys. Appl. Phys.* **2016**, *49*, 85103–85103.
- [14] J. Li, Z. Ma, C. He, Q. Li, K. Wu, *J. Mater. Chem. C* **2016**, *4*, 1926–1934.
- [15] Z. Ma, K. Wu, R. Sa, K. Ding, Q. Li, *Aip Advances* **2012**, *2*, 032170.
- [16] Z. Ma, K. Wu, R. Sa, Q. Li, Y. Zhang, *J. Alloy. Compd.* **2013**, *568*, 16–20.
- [17] B. Champagne, D. M. Bishop, *Adv. Chem. Phys.* **2003**, *126*, 41–92.
- [18] A. H. Reshak, S. Auluck, I. V. Kityk, *Phys. Rev. B* **2007**, *75*, 245120.
- [19] Y.-Z. Huang, L.-M. Wu, X.-T. Wu, L.-H. Li, L. Chen, Y.-F. Zhang, *J. Am. Chem. Soc.* **2010**, *132*, 12788–12789.
- [20] Z. Z. Luo, C. S. Lin, H. H. Cui, W. L. Zhang, H. Zhang, Z. Z. He and W. D. Cheng, *Chem. Mater.*, **2014**, *26*, 2743–2749.
- [21] G. M. Li, Y. Chu and Z. X. Zhou, *Chem. Mater.*, **2018**, *30*, 602–606.
- [22] G. M. Li, K. Wu, Q. Liu, Z. H. Yang and S. L. Pan, *J. Am. Chem. Soc.*, **2016**, *138*, 7422–7428.
- [23] K. Wu, B. B. Zhang, Z. H. Yang and S. L. Pan, *J. Am. Chem. Soc.*, **2017**, *139*, 14885–14888.
- [24] Y. Y. Li, P. F. Liu and L. M. Wu, *Chem. Mater.*, **2017**, *29*, 5259–5266.
- [25] D. J. Mei, J. Q. Jiang, F. Liang, S. Y. Zhang, Y. D. Wu, C. T. Sun and Z. S. Lin, *J. Mater. Chem. C*, **2018**, *6*, 2684–2689.

## *Electronic Supplementary Information (ESI)*

---

- [26] J. A. Brant, D. J. Clark, Y. S. Kim, J. I. Jang, A. Weiland and J. A. Aitken, *Inorg. Chem.*, **2015**, *54*, 2809–2819.
- [27] K. Wu, Z. H. Yang and S. L. Pan, *Angew. Chem. Int. Ed.*, **2016**, *55*, 6713–6715.
- [28] A. Harasaki and K. Kato, *Jpn. J. Appl. Phys.*, **1997**, *36*, 700–703.
